# Supplementary material for: Significant Effects of Oral Phenylbutyrate and Vitamin D3 Adjunctive Therapy in Pulmonary Tuberculosis: A Randomized Controlled Trial
Source: PubMed Central journal article supplement (PMC4578887; doi:10.1371/journal.pone.0138340), 2015-09-22
Supplement: pone.0138340.s007.pdf [file pone.0138340.s007.pdf]

## CASE REPORT FORM

Pt ID# \_\_\_\_\_

Week 0: Date: \_\_\_\_\_

**Clinical history:**

General appearance:     mildly ill             moderately ill             severely ill  
 Infection site:             pulmonary             pulmonary and/or \_\_\_\_\_

**Signs and Symptoms:**    Duration of symptoms since: \_\_\_\_\_

|                | <u>Yes</u>               | <u>No</u>                |                          | <u>Yes</u>               | <u>No</u>                |                            |
|----------------|--------------------------|--------------------------|--------------------------|--------------------------|--------------------------|----------------------------|
| 1. Fever       | <input type="checkbox"/> | <input type="checkbox"/> | 5. Contact w/active case | <input type="checkbox"/> | <input type="checkbox"/> | 9. Weight (kg) _____       |
| 2. Cough       | <input type="checkbox"/> | <input type="checkbox"/> | 6. Loss of appetite      | <input type="checkbox"/> | <input type="checkbox"/> | 10. Others (Specify) _____ |
| 3. Chest pain  | <input type="checkbox"/> | <input type="checkbox"/> | 7. Nausea                | <input type="checkbox"/> | <input type="checkbox"/> | _____                      |
| 4. Haemoptysis | <input type="checkbox"/> | <input type="checkbox"/> | 8. Anorexia              | <input type="checkbox"/> | <input type="checkbox"/> |                            |

**Other information:**

|                    | <u>Yes</u>               | <u>No</u>                |              | <u>Yes</u>               | <u>No</u>                |                        | <u>Yes</u>               | <u>No</u>                |
|--------------------|--------------------------|--------------------------|--------------|--------------------------|--------------------------|------------------------|--------------------------|--------------------------|
| 1. Previous H/O TB | <input type="checkbox"/> | <input type="checkbox"/> | 2. BCG given | <input type="checkbox"/> | <input type="checkbox"/> | 3. Current steroid use | <input type="checkbox"/> | <input type="checkbox"/> |

**Laboratory:**

1. AFB (score, 0-3+)     0     1+     2+     3+

2. L-J culture     neg     pos    #colonies     1+     2+     3+     4+     conta/lost

3. Sensitivity: Rif \_\_\_\_\_ INH \_\_\_\_\_ ETH \_\_\_\_\_ PZA \_\_\_\_\_ STR \_\_\_\_\_

4. PPD             prior positive             current \_\_\_\_\_ mm             not done

5. Chest X-ray \_\_\_\_\_ % involvement \_\_\_\_\_

6. Blood: ESR \_\_\_\_\_ Hb \_\_\_\_\_ TC \_\_\_\_\_ Neutrophils \_\_\_\_\_ Lymphocytes \_\_\_\_\_

**Week 1: Follow up date:** \_\_\_\_\_

1. a) Received anti-TB treatment     regular     irregular \_\_\_\_\_  
 b) Received supplement             regular     irregular \_\_\_\_\_

2. Fever: \_\_\_\_\_            5. Appetite: \_\_\_\_\_            7. Joint pain: \_\_\_\_\_

3. Cough: \_\_\_\_\_            6. Anorexia: \_\_\_\_\_            8. Jaundice: \_\_\_\_\_

4. Weight (kg): \_\_\_\_\_

9. AFB (score,0-3+)             0     1+     2+     3+     no sputum

Comments: \_\_\_\_\_

**Week 2: Follow up date:** \_\_\_\_\_

- 1. a) Received anti-TB treatment     regular     irregular \_\_\_\_\_
  - b) Received supplement         regular     irregular \_\_\_\_\_
  - 2. Fever: \_\_\_\_\_                      5. Appetite: \_\_\_\_\_                      7. Joint pain: \_\_\_\_\_
  - 3. Cough: \_\_\_\_\_                      6. Anorexia: \_\_\_\_\_                      8. Jaundice: \_\_\_\_\_
  - 4. Weight (kg): \_\_\_\_\_
  - 9. AFB (score,0-3+):                       0     1+     2+     3+     no sputum
- Comments: \_\_\_\_\_

**Week 3: Follow up date:** \_\_\_\_\_

- 1. a) Received anti-TB treatment     regular     irregular \_\_\_\_\_
  - b) Received supplement         regular     irregular \_\_\_\_\_
  - 2. Fever: \_\_\_\_\_                      5. Appetite: \_\_\_\_\_                      7. Joint pain: \_\_\_\_\_
  - 3. Cough: \_\_\_\_\_                      6. Anorexia: \_\_\_\_\_                      8. Jaundice: \_\_\_\_\_
  - 4. Weight (kg): \_\_\_\_\_
  - 9. AFB (score,0-3+):                       0     1+     2+     3+     no sputum
- Comments: \_\_\_\_\_

**Week 4: Follow up date:** \_\_\_\_\_

- 1. a) Received anti-TB treatment     regular     irregular \_\_\_\_\_
  - b) Received supplement         regular     irregular \_\_\_\_\_
  - 2. Fever: \_\_\_\_\_                      5. Appetite: \_\_\_\_\_                      7. Joint pain: \_\_\_\_\_
  - 3. Cough: \_\_\_\_\_                      6. Anorexia: \_\_\_\_\_                      8. Jaundice: \_\_\_\_\_
  - 4. Weight (kg): \_\_\_\_\_
  - 9. AFB (score,0-3+):                       0     1+     2+     3+     no sputum
  - 10. L-J culture:     neg     pos (#colonies  1+     2+     3+     4+     conta/lost
  - 12. Blood: ESR \_\_\_\_\_ Hb \_\_\_\_\_ TC \_\_\_\_\_ Neutrophils \_\_\_\_\_ Lymphocytes \_\_\_\_\_
- Comments: \_\_\_\_\_

**Week 6: Follow up date:** \_\_\_\_\_

- 1. a) Received anti-TB treatment     regular     irregular \_\_\_\_\_
- b) Received supplement         regular     irregular \_\_\_\_\_
- 2. Fever: \_\_\_\_\_                      5. Appetite: \_\_\_\_\_                      7. Joint pain: \_\_\_\_\_
- 3. Cough: \_\_\_\_\_                      6. Anorexia: \_\_\_\_\_                      8. Jaundice: \_\_\_\_\_
- 4. Weight (kg): \_\_\_\_\_
- 9. AFB (score,0-3+):                       0     1+     2+     3+     no sputum

Comments: \_\_\_\_\_

**Week 8: Follow up date:**

- 1. a) Received anti-TB treatment     regular     irregular \_\_\_\_\_
- b) Received supplement         regular     irregular \_\_\_\_\_
- 2. Fever: \_\_\_\_\_                      5. Appetite: \_\_\_\_\_                      7. Joint pain: \_\_\_\_\_
- 3. Cough: \_\_\_\_\_                      6. Anorexia: \_\_\_\_\_                      8. Jaundice: \_\_\_\_\_
- 4. Weight (kg): \_\_\_\_\_
- 9. AFB (score,0-3+):                       0     1+     2+     3+     no sputum
- 10. L-J culture:     neg     pos (#colonies  1+     2+     3+     4+     conta/lost
- 11. Chest X-ray \_\_\_\_\_ % involvement \_\_\_\_\_
- 12. Blood: ESR \_\_\_\_\_ Hb \_\_\_\_\_ TC \_\_\_\_\_ Neutrophils \_\_\_\_\_ Lymphocytes \_\_\_\_\_

Comments: \_\_\_\_\_

**Week 10: Follow up date:**

- 1. Received anti-TB treatment     regular     irregular \_\_\_\_\_
- 2. Fever: \_\_\_\_\_                      5. Appetite: \_\_\_\_\_                      7. Joint pain: \_\_\_\_\_
- 3. Cough: \_\_\_\_\_                      6. Anorexia: \_\_\_\_\_                      8. Jaundice: \_\_\_\_\_
- 4. Weight (kg): \_\_\_\_\_
- 9. AFB (score, 0-3+):                       0     1+     2+     3+     no sputum

Comments: \_\_\_\_\_

**Week 12: Follow up date:**

- 1. Received anti-TB treatment     regular     irregular \_\_\_\_\_
- 2. Fever: \_\_\_\_\_                      5. Appetite: \_\_\_\_\_                      7. Joint pain: \_\_\_\_\_
- 3. Cough: \_\_\_\_\_                      6. Anorexia: \_\_\_\_\_                      8. Jaundice: \_\_\_\_\_
- 4. Weight (kg): \_\_\_\_\_
- 9. AFB (score,0-3+):                       0     1+     2+     3+     no sputum

10. Chest X-ray \_\_\_\_\_ % involvement \_\_\_\_\_

Comments: \_\_\_\_\_

**Week 24: Follow up date:**

- 1. Received anti-TB treatment     regular     irregular \_\_\_\_\_
- 2. Fever: \_\_\_\_\_                      5. Appetite: \_\_\_\_\_                      7. Joint pain: \_\_\_\_\_
- 3. Cough: \_\_\_\_\_                      6. Anorexia: \_\_\_\_\_                      8. Jaundice: \_\_\_\_\_
- 4. Weight (kg): \_\_\_\_\_
- 9. AFB (score,0-3+):                       0     1+     2+     3+     no sputum

10. Chest X-ray \_\_\_\_\_ % involvement \_\_\_\_\_

Comments: \_\_\_\_\_
